# Supplementary material for: Identification of a novel gene pairs signature in the prognosis of gastric cancer
Source: PubMed Central journal article supplement (PMC5806102; doi:10.1002/cam4.1303), 2017-12-28
Supplement: CAM4-7-344-s001.pdf [file CAM4-7-344-s001.pdf]

**Table S1.** Sensitivity analysis for the prognosis-related gene pairs signature.

| <b>Gene pair omitted</b> | <b>AUC</b> |
|--------------------------|------------|
| ACOT7-MIR6756            | 0.806      |
| CES1-RAB11FIP4           | 0.813      |
| IPMK-RBPMS2              | 0.806      |
| NES-RPS27L               | 0.798      |
| NES-TPMT                 | 0.816      |
| PBX3-TNFRSF11A           | 0.802      |
| TMEM245-TNFRSF11A        | 0.808      |
| Overall                  | 0.820      |

AUC, area under time-dependent receiver operating characteristics (ROC) curve.

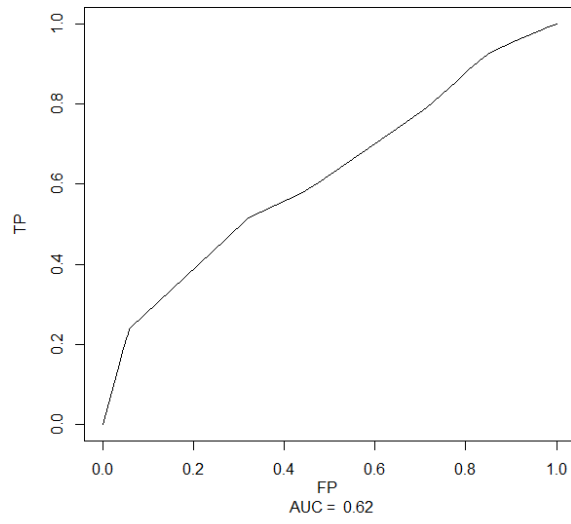

**Figure S1.** Time-dependent receiver operating characteristic (ROC) curve of the pseudo prognosis-related gene pairs signature.

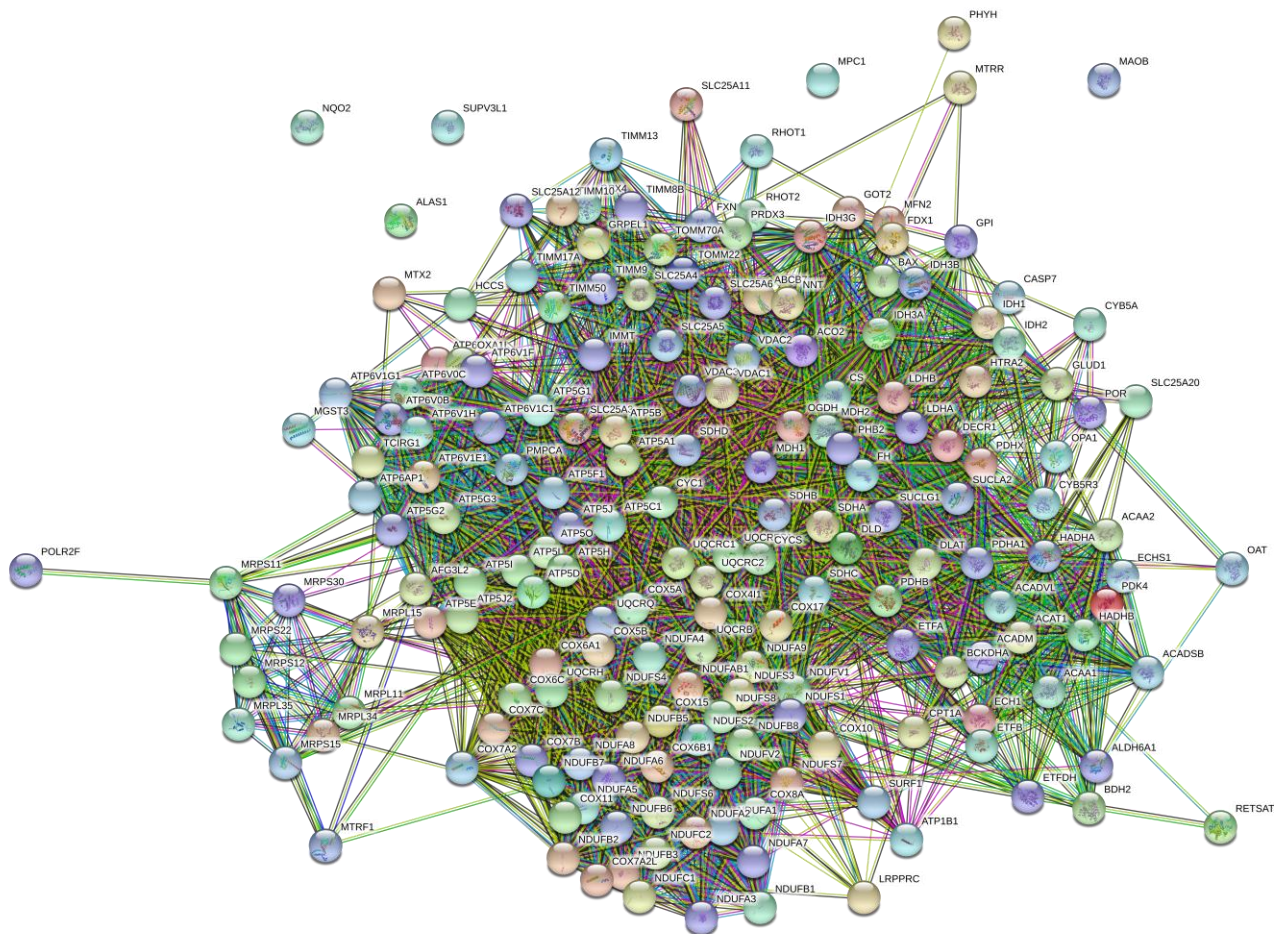

**Figure S2.** Protein–protein interaction network of genes in the enriched set of “oxidation and phosphorylation”.
